# Supplementary material
Source: ML conference proceedings conference paper supplement (https://openaccess.thecvf.com/content/CVPR2023/html/Rao_TranSG_Transformer-Based_Skeleton_CVPR_2023_paper.html)
Supplement: Supplementary file 4 [file Rao_TranSG_Transformer-Based_Skeleton_CVPR_2023_supplemental.zip]

Archive with 4 entries (4 files):
- Appendix I Theoretical Hypotheses and Analyses.pdf
- __MACOSX/._Appendix I Theoretical Hypotheses and Analyses.pdf
- Appendix II Experiments.pdf
- __MACOSX/._Appendix II Experiments.pdf
